# Supplementary material for: Fusing Ta-doped Li7La3Zr2O12 grains using nanoscale Y2O3 sintering aids for high-performance solid-state lithium batteries
Source: Royal Society of Chemistry journal article supplement (doi:10.1039/d4nr01992j), 2024-01-01
Supplement: d4nr01992j1.pdf [file d4nr01992j1.pdf]

## Supplementary Information

### **Fusing Ta-Doped $\text{Li}_7\text{La}_3\text{Zr}_2\text{O}_{12}$ Grains by Nanoscale $\text{Y}_2\text{O}_3$ Sintering Aids for High-Performance Solid-State Lithium Batteries**

Hongyi Zhang<sup>a,1</sup>, Yunfan Wu<sup>a,1</sup>, Jie Zhu<sup>a</sup>, Xujia Xie<sup>a</sup>, Zixi Liu<sup>a</sup>, Zewenhui Zhang<sup>a</sup>, Yishu Ma<sup>a</sup>, Ting Huang<sup>a</sup>, Laisen Wang<sup>a</sup>, Jie Lin<sup>a,\*</sup>, Qingshui Xie<sup>a,\*</sup>, Dong-Liang Peng<sup>a,\*</sup>

<sup>a</sup> College of Materials, Collaborative Innovation Center of Chemistry for Energy Materials, State Key Laboratory for Physical Chemistry of Solid Surfaces, Fujian Key Laboratory of Surface and Interface Engineering for High Performance Materials, Xiamen University, Xiamen, Fujian, 361005, China

<sup>1</sup>These two authors contributed equally to this work.

\*Corresponding authors: [linjie@xmu.edu.cn](mailto:linjie@xmu.edu.cn); [xieqsh@xmu.edu.cn](mailto:xieqsh@xmu.edu.cn); [dlpeng@xmu.edu.cn](mailto:dlpeng@xmu.edu.cn)

**Table S1. Stoichiometries of LLZTO pellets obtained from ICP-OES Tests.**

| Samples      | Li   | La   | Zr   | Ta   | Y    | Stoichiometries                                                                                |
|--------------|------|------|------|------|------|------------------------------------------------------------------------------------------------|
| LLZTO-P      | 7.30 | 3.27 | 1.54 | 0.19 | 0.00 | $\text{Li}_{7.3}\text{La}_{3.27}\text{Zr}_{1.54}\text{Ta}_{0.19}\text{O}_{12}$                 |
| LLZTO-1%NYO  | 6.83 | 3.23 | 1.54 | 0.23 | 0.08 | $\text{Li}_{6.83}\text{La}_{3.23}\text{Zr}_{1.54}\text{Ta}_{0.23}\text{Y}_{0.08}\text{O}_{12}$ |
| LLZTO-2%NYO  | 6.76 | 3.21 | 1.53 | 0.26 | 0.13 | $\text{Li}_{6.76}\text{La}_{3.21}\text{Zr}_{1.53}\text{Ta}_{0.26}\text{Y}_{0.13}\text{O}_{12}$ |
| LLZTO-5%NYO  | 6.84 | 3.19 | 1.52 | 0.30 | 0.22 | $\text{Li}_{6.84}\text{La}_{3.19}\text{Zr}_{1.52}\text{Ta}_{0.30}\text{Y}_{0.22}\text{O}_{12}$ |
| LLZTO-10%NYO | 7.08 | 3.13 | 1.57 | 0.30 | 0.65 | $\text{Li}_{7.08}\text{La}_{3.13}\text{Zr}_{1.57}\text{Ta}_{0.30}\text{Y}_{0.65}\text{O}_{12}$ |

**Table S2. Size data for measuring relative density.**

| Samples      | Quality (mg) | Thickness (mm) | Diameter (mm) | Density<br>( $\text{g cm}^{-3}$ ) | Relative<br>density (%) |
|--------------|--------------|----------------|---------------|-----------------------------------|-------------------------|
| LLZTO-P      | 839.65       | 1.50           | 12.10         | 4.87                              | 90.87                   |
| LLZTO-1%NYO  | 843.08       | 1.52           | 12.08         | 4.84                              | 90.34                   |
| LLZTO-2%NYO  | 813.98       | 1.44           | 12.08         | 4.93                              | 92.06                   |
| LLZTO-5%NYO  | 777.16       | 1.42           | 11.64         | 5.15                              | 96.00                   |
| LLZTO-10%NYO | 495.08       | 1.08           | 11.56         | 4.37                              | 81.53                   |

**Table S3. Comparison of ionic conductivity with reported LLZTO electrolytes.**

| Composition                                                                                               | Conductivity<br>( $\text{S cm}^{-1}$ ) | Synthesis method                           | Reference |
|-----------------------------------------------------------------------------------------------------------|----------------------------------------|--------------------------------------------|-----------|
| $\text{Li}_{6.4}\text{La}_3\text{Zr}_{1.4}\text{Ta}_{0.6}\text{O}_{12}$                                   | $6.1 \times 10^{-4}$                   | Molten salt synthesis                      | 1         |
| 10 mol% $\text{Al}_2\text{O}_3$ + $\text{Li}_{6.4}\text{La}_3\text{Zr}_{1.4}\text{Ta}_{0.6}\text{O}_{12}$ | $3.1 \times 10^{-4}$                   | $\text{Al}_2\text{O}_3$ sintering additive | 2         |
| 5 wt% MgO + $\text{Li}_{6.4}\text{La}_3\text{Zr}_{1.4}\text{Ta}_{0.6}\text{O}_{12}$                       | $5.2 \times 10^{-4}$                   | MgO sintering additive                     | 3         |
| 6 wt% MgO + $\text{Li}_{6.4}\text{La}_3\text{Zr}_{1.4}\text{Ta}_{0.6}\text{O}_{12}$                       | $5.17 \times 10^{-4}$                  | MgO sintering additive                     | 4         |
| 1 mol% $\text{SiO}_2$ + $\text{Li}_{6.4}\text{La}_3\text{Zr}_{1.4}\text{Ta}_{0.6}\text{O}_{12}$           | $3.84 \times 10^{-4}$                  | $\text{SiO}_2$ sintering additive          | 5         |
| $\text{SnO}_2$ coated $\text{Li}_{6.4}\text{La}_3\text{Zr}_{1.4}\text{Ta}_{0.6}\text{O}_{12}$             | $1.6 \times 10^{-3}$                   | Hot pressing and coating                   | 6         |
| $\text{Li}_{6.84}\text{La}_{3.19}\text{Zr}_{1.52}\text{Ta}_{0.30}\text{Y}_{0.22}\text{O}_{12}$            | $7.39 \times 10^{-4}$                  | $\text{Y}_2\text{O}_3$ sintering additive  | This work |

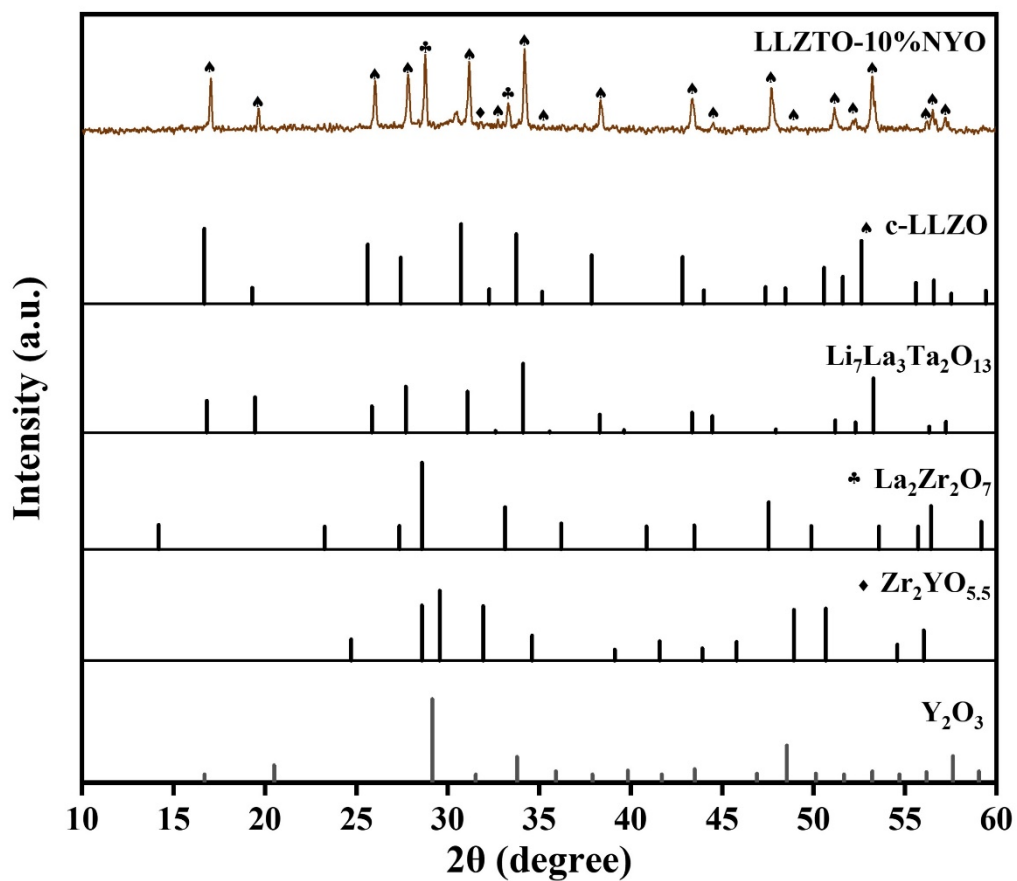

**Figure S1.** XRD patterns of LLZTO-10%NYO powder.

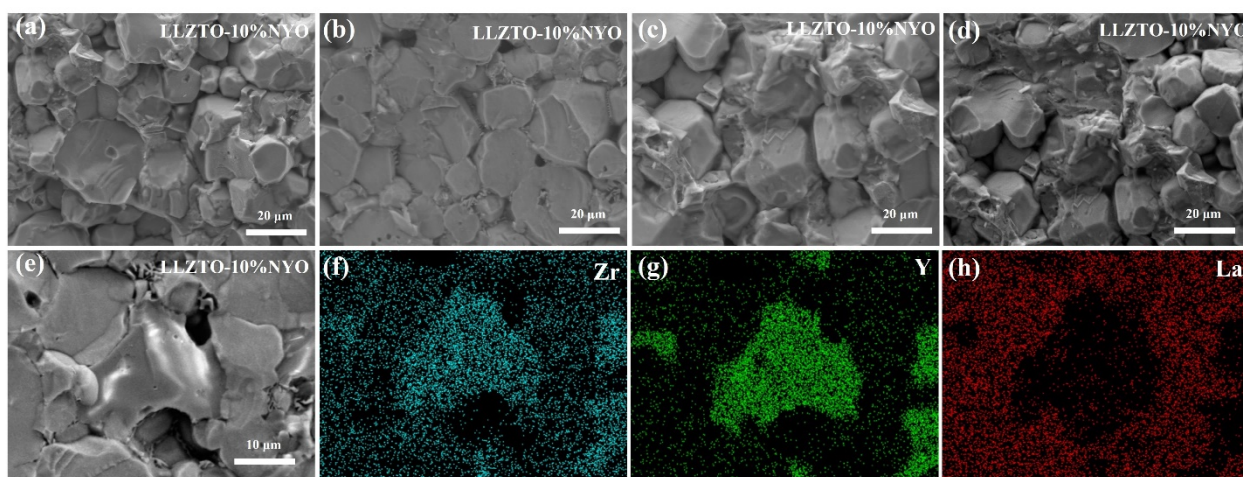

**Figure S2.** Cross-section SEM images (a-d) and elemental mappings (e-h) of LLZTO-10%NYO.

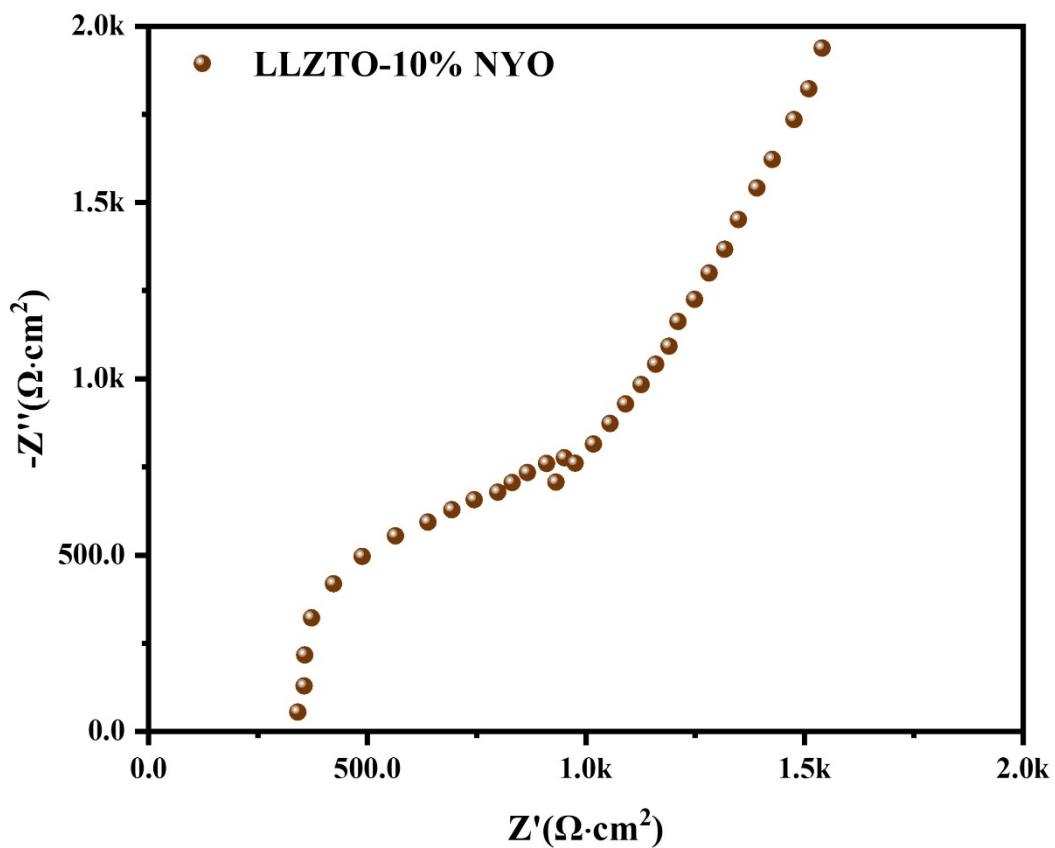

Figure S3. EIS plots of Ag|LLZTO-10%NYO|Ag cell.

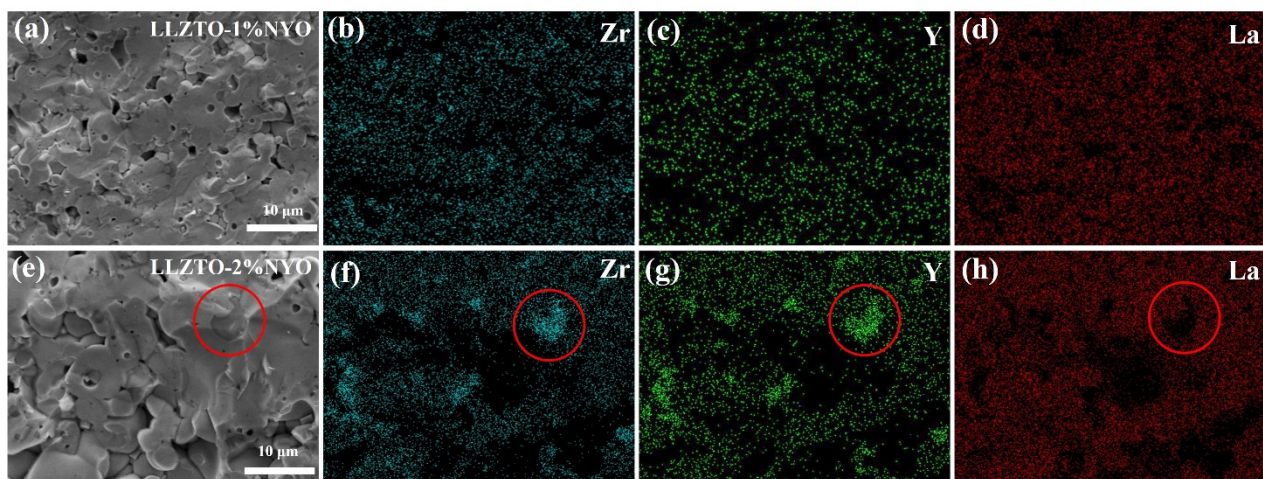

Figure S4. Elemental mappings of (a-d) LLZTO-1%NYO and (e-h) LLZTO-2%NYO pellets.

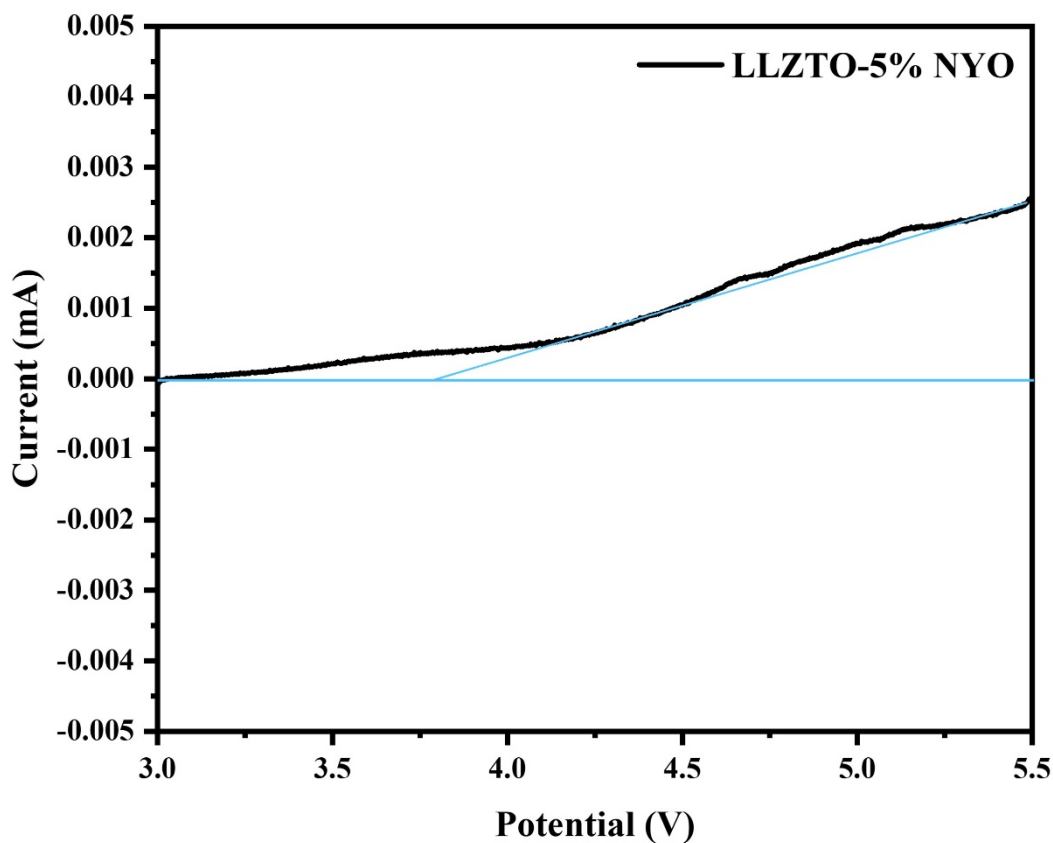

Figure S5. Linear scanning voltammetry (LSV) curve of SS|LLZTO-5%NYO|Li cell.

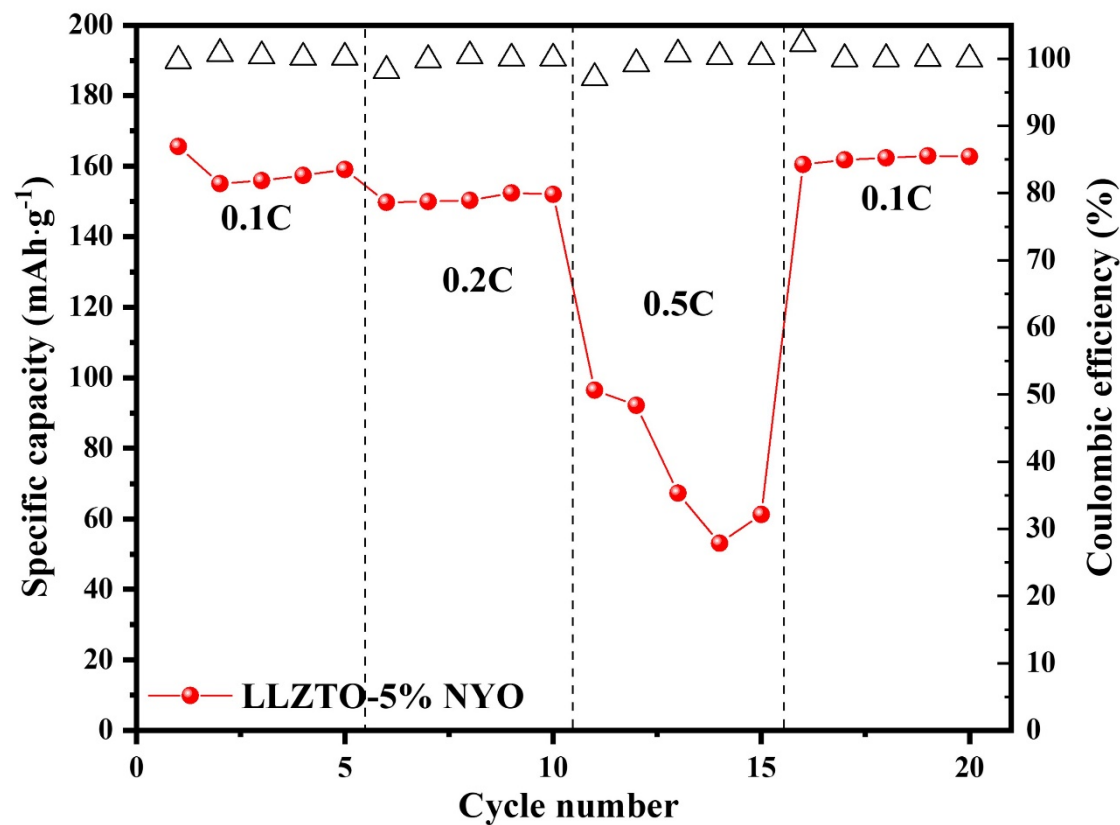

Figure S6. Rate Capability of LiFePO<sub>4</sub>|LLZTO-5%NYO|Li full cell.

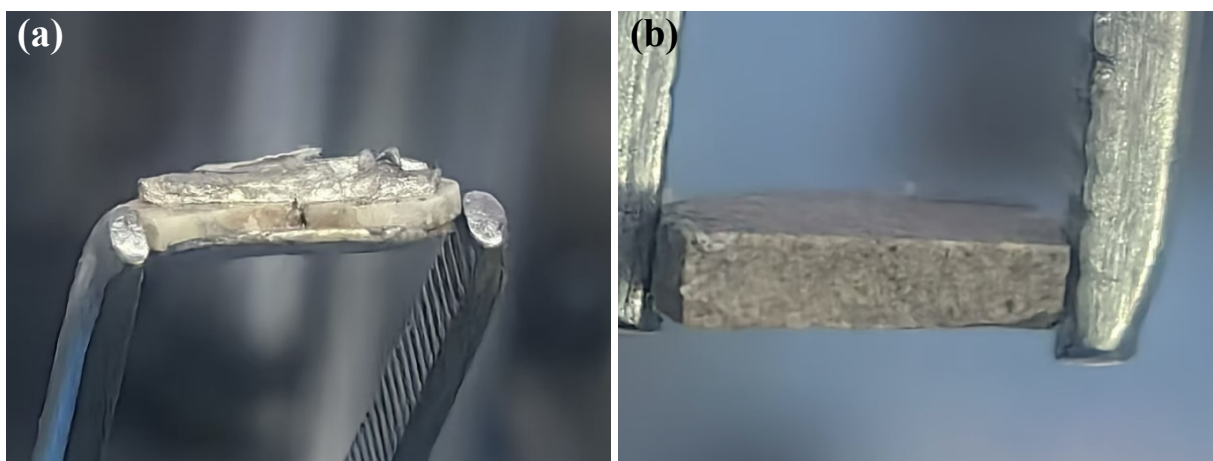

**Figure S7.** Cross section photos of (a) LLZTO-P and (b) LLZTO-5%NYO pellets after cycling.

### References

1. J. M. Weller and C. K. Chan, *Acs Appl Energ Mater*, 2020, 3, 6466-6475.
2. K. K. Zhang, T. Xu, H. L. Zhao, S. S. Zhang, Z. J. Zhang, Y. Zhang, Z. H. Du and Z. L. Li, *Int J Energ Res*, 2020, 44, 9177-9184.
3. X. Huang, C. Liu, Y. Lu, T. P. Xiu, J. Jin, M. E. Badding and Z. Y. Wen, *J Power Sources*, 2018, 382, 190-197.
4. X. Huang, Y. Lu, Z. Song, T. P. Xiu, M. E. Badding and Z. Y. Wen, *J Energy Chem*, 2019, 39, 8-16.
5. S. S. Zhang, H. L. Zhao, J. Wang, T. Xu, K. K. Zhang and Z. H. Du, *Chem Eng J*, 2020, 393.
6. Y. Chen, M. H. He, N. Zhao, J. M. Fu, H. Y. Huo, T. Zhang, Y. Q. Li, F. F. Xu and X. X. Guo, *J Power Sources*, 2019, 420, 15-21.
